# Supplementary material for: A vaccinia-based single vector construct multi-pathogen vaccine protects against both Zika and chikungunya viruses
Source: PubMed Central journal article supplement (PMC5964325; doi:10.1038/s41467-018-03662-6), 2018-03-26
Supplement: 41467_2018_3662_MOESM1_ESM.pdf [file 41467_2018_3662_MOESM1_ESM.pdf]

## Supplementary figures

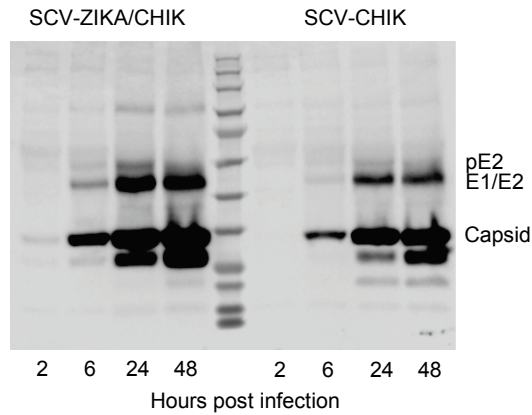

**Supplementary Fig. 1.** Western blot using mouse polyclonal anti-CHIKV sera (as in Fig. 1e) of lysates of HeLa cells infected with SCV-ZIKA/CHIK or SCV-CHIK (MOI $\approx$ 5) and harvested at the indicated time points.

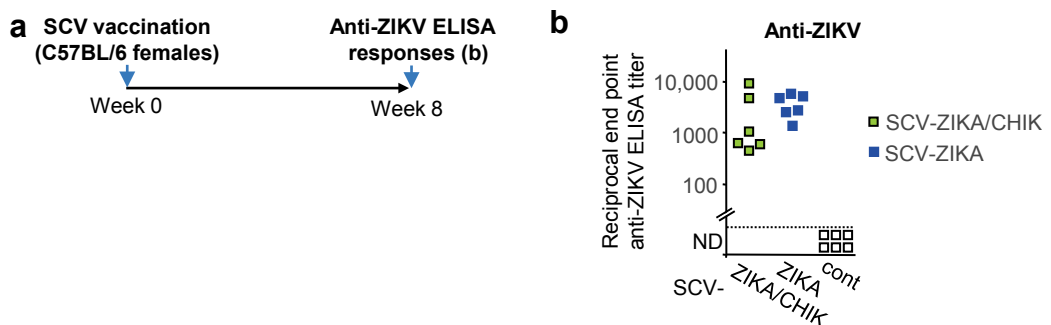

**Supplementary Fig. 2.** **a** Timeline of vaccination and antibody assays. Mice were vaccinated with SCV-ZIKA/CHIK as in Fig 2a, and the same dose and route of SCV-ZIKA or SCV-cont. **b** IgG ELISA titers determined as in Fig. 2b.

SCV-ZIKA was constructed by replacing the CHIKV structural gene cassette from SCV-ZIKA/CHIK with an EcoGPT/GFP expression cassette, with the EcoGPT/GFP expression cassette subsequently removed by intramolecular recombination.

**Supplementary Fig. 3.** Nucleotide sequences for the CHIKV and ZIKV immunogen inserts and D13L deletion for SCV-ZIKA/CHIK.

**CHIKV immunogen genes located between A38L and A40R ORFs**

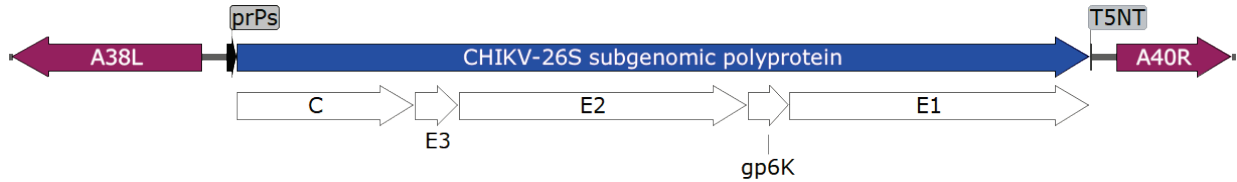

LOCUS Exported 5381 bp ds-DNA linear VRL 27-FEB-2018  
 DEFINITION CHIKV-26S expression cassette within SCV1002.  
 ACCESSION .  
 VERSION .  
 KEYWORDS .  
 SOURCE SCV1002  
 ORGANISM SCV1002  
 REFERENCE 1 (bases 1 to 5381)  
 AUTHORS Paul Howley  
 TITLE Direct Submission  
 JOURNAL Exported Feb 27, 2018 from SnapGene 4.1.5  
<http://www.snapgene.com>  
 COMMENT CHIKV-26S expression cassette was inserted by homologous recombination to replace the A39R ORF  
 FEATURES Location/Qualifiers  
   source 1..5381  
     /organism="SCV1002"  
     /strain="Copenhagen"  
     /mol\_type="genomic DNA"  
     /note="SCV single vectored chikungunya and Zika virus vaccine - CHIKV expression cassette insertion site replacing A39R ORF"  
   CDS complement(13..846)  
     /codon\_start=1  
     /product="CD47 antigen/integrin-associated protein"  
     /label=A38L  
     /note="VACV-COP-A38L ORF"  
     /translation="MSRVRIISLIYLYTLVVIITTTKTIEYTACNDTIIIPCTIDNPTKYI  
     RWKLDNHDILTYNKTSKTTILSKWHTSARLHSLSDSDVSLIEYKDILPGTYTCEDNTG  
     IKSTVKLVQLHTNWFNDYQTMFMFIFTGITLFLFLLEITYTSISVVFSTNLGILQVFGC  
     VIAMIELCGAFLFYPSMFTLRHIIIGLLMMLTLPISFLIITKVFVFWLLCKLSCAVHLIIY  
     YQLAGYILTIVLGLGLSLKECVDGTLTLLSGLGTIMVSEHFSLLFLVCFPSTQRDYY"  
   promoter 957..1000  
     /label=prPs  
     /note="Vaccinia strong early/late promoter"  
   CDS 1001..4747  
     /codon\_start=1  
     /product="CHIKV 26S subgenomic polyprotein"  
     /label=CHIKV-26S subgenomic polyprotein  
     /note="Chikungunya virus 26S subgenomic polyprotein coding sequence from Reunion strain that adapted to Aedes albopictus mosquito (Genbank: AM258992)"  
     /translation="MEFIPTQTFYNNRRYQPRPWTTPRPTIQVIRPRPRPQRQAGQLAQLI  
     SAVNKLTMRVPPQKPRNRNKNKKQKQKQAPQNNNTNQKKQPPKKKPAQKKKPKRRER  
     MCMKIENDCIFEVKHEGKVTGYACLVGDKVMKPAHVKGITIDNADLAKLAFKRSSKYDLE  
     CAQIPVHMKSDASKFTHEKPEGYYNWHGAVQYSGGRFTIPTGAGKPGDSGRPIFDNKG  
     RVVAIVLGGANEGARTALSVVTWNKDIVTKITPEGAEWWSLAI PVMCLLANTFPCSQP  
     PCTPCCYEKEPEETLRMLEDNVMPGYQLLQASLTCSPHRQRRSTKDNFNVYKATRPY  
     LAHCPDCGEGHSPVALERIRNEATDGTLLKIQVSLQIGIKTDDSHDWTKLRVMDNHNH  
     PADAERAGL FVRTSAPCTITGTMGHFILARCPKGETLTVGF TDSRKISHSCTHPFHHD

PVIGREKFHSRPQHKGELPCSTYVQSTAAATTEEIEVHMPPDTPDRTLMSQQSGNVKITV  
 NGQTVRYKCNCGGSNEGLTTTQDKVINNCKVDQCHAAVTNHHKWKQYNSPLVPRNAELGDR  
 KGKIHIPFPLANVTCRVPKARNPTVTYGKNQVIMLLYPDHPTLLSYRNMGEFPNYQEEW  
 VMHKKEVVLTVPTGLEVTWGNNEPYKYWPQLSTNGTAHGHPEIILYYELYPTMTVV  
 VVSVATFILLSMVGMAGMCMCARRRCITPYELTPGATVPFLLSLICIRTAKAATYQE  
 AAIYLWNEQQPLFWLQALIPLAALIVLCNCLRLLPCCCKTLAFLAVMSVGAHTVSAYEH  
 VTVIPNTVGVVPYKTLVNRPGYSPMVLEMELLSVTLPTLSLDYITCEYKTVIPSPYVKC  
 CGTAECKDKNLPDYSCKVFYVYPMWGGAYCFDAENTQLSEAHVEKSECKTEFASA  
 YRAHTASASAKLRVLYQNNITVTAYANGDHAVTVKDAKFLVGPMSAWTPFDNKIVVY  
 KGDVYNMDYPPFGAGRPGQFGDIQSRTPESKDVYANTQLVLRPAVGTVHVYPYSQAPSG  
 FKYWLKERGASLQHTAPFGCQIATNPVRAVNCVAVGNMPSIDIPEAAFTRVVDAPSLTD  
 MSCEVPACTHSSDFGGVAIIKYAASKKGGKCAVHSMTNAVITREAEIEVEGNSQLQISFS  
 TALASAEFRVQVCSTQVHCAAECPPKDHIVNYPASHTTLGVQDISATAMSWVQKITGG  
 VGLVVAVALILIVVLCVSFSRH"

mat\_peptide 1001..1783  
 /product="Capsid protein"  
 /label=C  
 /note="Chikungunya virus capsid protein"  
 mat\_peptide 1784..1975  
 /product="glycoprotein E3"  
 /label=E3  
 /note="Chikungunya virus envelope protein"  
 mat\_peptide 1976..3244  
 /product="glycoprotein E2"  
 /label=E2  
 /note="Chikungunya virus envelope protein"  
 mat\_peptide 3245..3427  
 /product="glycoprotein 6K protein"  
 /label=gp6K  
 /note="Chikungunya virus envelope protein"  
 mat\_peptide 3428..4747  
 /product="glycoprotein E1"  
 /label=E1  
 /note="Chikungunya virus envelope protein"  
 misc\_feature 4748..4754  
 /label=T5NT  
 /note="Pox virus early transcription stop sequence"  
 CDS 4866..5372  
 /codon\_start=1  
 /product="C-type lectin-like protein; SUMO-1 modified  
 protein; sumoylated protein"  
 /label=A40R  
 /note="VACV-COP-A40R ORF"  
 /translation="MNKPKTDYAGYACCVICGLIVGIIIFTATLLKVVERKLVHTPSIDK  
 TIKDAYIREDCPDWDWISYNNKCIHLSTDRKTWEGRNTCKALNPNSDLIKIETPNELSF  
 LRSLRRGYWVGESEILNQTFYPIAKNATKNGNIFVAQRILPNCIRVTLVYNNYTTFLS  
 YHYFG"

ORIGIN

```

1 ttataactcat gcctagtaat agtctctttg cgttgacgga aagcagacta gaaataacag
61 gctaaaaatgt tcagacacca taatagttcc caaccagat aataacagag taccatcaac
121 acattccttt aaactcaatc ccaaaccocaa aaccgttaa atgtatccgg ccaattgata
181 gtagataatg aggtgtacag cgcgatgataa tttacacagt aacccaaatg aaaatacttt
241 agtaattata agaaatatag atggtaacgt catcatcaac aatccaataa tatgccggag
301 agtaaacatt gacggataaa acaaaaatgc tccgcataac tctatcatgg caataacaca
361 accaaatact tgtaagattc ctaaattagt agaaaataca acggatatcg atgtataagt
421 gatctcgaga aataataaga ataaagtaat gcccgtaaag ataaacatca acattgtttg
481 gtaatcatta aaccaattag tatgaagttg aactaatttc acagtagatt ttattccagt
541 gttatcctcg catgtataag tacctgttaa gatatcttta tattctataa tcaatgagac
601 atcactatcc gataacgaat gaagtctagc actagtatgc catttactta atattgtcgt
661 cttggaagtt ttattataag ttaaaatatac atggttatcc aatttccatc taatatactt
721 tgtcggatta tctatagtac acggaataat gatggtatca ttacatgctg tataacttat
781 ggtctttgta gttgttataa caaccaacgt atagaggtat atcaacgata ttctaactct
841 tgacattttt tttttattta aatgatatac tttgttattt attttattct attttgctaa
901 cggatttgaa tggcataagt ttgaaacgag tgaagaaata atttctactt aattaacaaa
961 aaattgaaat tttatttttt ttttttgtaa tataaataat atggagttca tcccaaccca
1021 aactttttac aataggaggt accagcctcg accctggact ccgcgcctca ctatccaagt
1081 catcaggccc agaccgcgcc ctgagaggca agctgggcaa cttgccagc tgatctcagc
1141 agttaataaa ctgacaatgc gcgcggtacc ccaacagaag ccacgcagga atcggaagaa

```

1201 taagaagcaa aagcaaaaaac aacaggcgcc acaaaacaac acaaatcaaa agaagcagcc  
1261 acctaaaaag aaaccggctc aaaagaaaaa gaagccgggc cgcagagaga ggatgtgcat  
1321 gaaaatcgaa aatgattgta ttttcgaagt caagcacgaa ggtaaggtaa caggttacgc  
1381 gtgcctgggt ggggacaaaag taatgaaac agcacacgta aaggggacca tcgataacgc  
1441 ggacctggcc aaactggcct ttaagcgtc atctaagtat gaccttgaat gcgcgcat  
1501 acccgtgcac atgaagtccg acgcttcgaa gttcacccat gagaaaccgg aggggtacta  
1561 caactggcac cacggagcag tacagtactc aggaggccgg ttcaccatcc ctacaggtgc  
1621 tggcaaacca ggggacagcg gcagaccgat cttcgacaac aagggacgcg tgggtggcoat  
1681 agtcttagga ggagctaata aaggagcccg tacagccctc tcggtggtga cctggaataa  
1741 agacattgtc actaaaaatca cccccgaggg ggccgaagag tggagtcttg ccatcccagt  
1801 tatgtgcctg ttggcaaaa caccgttccc ctgctcccag ccccttga cccctgctg  
1861 ctacgaaaag gaaccggagg aaaccctacg catgcttgag gacaacgtca tgagactgg  
1921 gtactatcag ctgctacaag catcctaac atgttctccc caccgccagc gacgcagcac  
1981 caaggacaac ttcaatgtct ataaagccac aagaccatac ttagctcact gtcccactg  
2041 tggagaaggg cactcgtgcc atagtcccgt agcactagaa cgcatacagaa atgaagcgac  
2101 agacgggacg ctgaaaaatcc aggtctcctt gcaaatcgga ataaagacgg atgacagcca  
2161 cgattggacc aagctgcgtt atatggaaa ccacatgcca gcagacgcag agagggcggg  
2221 gctatttgta agaaccatcag caccgttacc gattactgga acaatgggac acttcatcct  
2281 ggccccgatgt ccaaaagggg aaactctgac ggtgggattc actgacgta ggaagattag  
2341 tcaactcatgt acgcacccat ttcaccacga ccctcctgtg ataggtcggg aaaaattcca  
2401 ttcccgaccg cagcacggtg aagagctacc ttgcagcacg tacgtgcaga gcaccgccgc  
2461 aactaccgag gagatagagg tacacatgcc cccagacacc cctgatcgca cattaatgtc  
2521 acaacagtcc ggcaacgtaa agatcacagt caatggccag acggtgcggt acaagtgtaa  
2581 ttgcggtggc tcaaatgaag gactaacaac tacagacaaa gtgattaata actgcaaggt  
2641 tgatcaatgt catgcccggg tcaccaatca caaaaagtgg cagtataact ccccttggg  
2701 cccgcgtaat gctgaacttg gggaccgaaa aggaaaaatt cacatcccgt tccgctggc  
2761 aatgtaaca tgcaggggtg ctaaagcaag gaacccacc gtgacgtacg ggaaaaacca  
2821 agtcatcatg ctactgtatc ctgaccacc aacactcctg tcctaccgga atatgggaga  
2881 agaaccaaac tatcaagaag agtgggtgat gcataagaag gaagtctgct taaccgtgcc  
2941 gactgaaggg ctcgagggtca cgtggggcaa caacgagccg tataagtatt ggccgcagtt  
3001 atctacaaac ggtacagccc atggccacc gcatagagata attctgtatt atctagct  
3061 gtacccact atgactgtag tagttgtgct agtggccacg ttcatactcc tgcgatggt  
3121 gggatattgca ggggggatgt gcatgtgtgc acgacgcaga tgcatacac cgtatgaact  
3181 gacaccagga gctaccgtcc ctttcctgct tagcctaata tgctgcatca gaacagctaa  
3241 agcggccaca taccaagagg ctgcatata cctgtggaac gagcagcaac ctttgtttg  
3301 gctacaagcc cttattccgc tggcagccct gattgttcta tgcaactgtc tgagactctt  
3361 accatctgtc tgtaaaactg tggctttttt agccgtaatg agcgtcgggt cccacactgt  
3421 gagcgcgtac gaacacgtaa cagtgtccc gaacacggtg ggagtaccgt ataagactct  
3481 agtcaataga cctggctaca gccccatggt attggagatg gaactactgt cagtcacttt  
3541 ggagccaaca ctatcgcttg attacatcac gtgagtagtac aaaaccgtca tcccgtctcc  
3601 gtacgtgaag tgctgcggtg cagcagagtg caaggacaaa aacctaccgt actacagctg  
3661 taaggtcttc accggcgtct acccatttat gtggggcggc gcctactgct tctgcgacgc  
3721 tgaaaacacg cagttgagcg aagcacacgt ggagaagtcc gaatcatgca aaacagaatt  
3781 tgatcagca tacagggctc ataccgcat tgcatacagct aagctccgcg tcctttacca  
3841 aggaaataac atcactgtaa ctgcctatgc aaacggcgac catgcccgtca cagttaaagg  
3901 cgccaaattc attgtggggc caatgtcttc agcctggaca ctttccgaca acaaaattgt  
3961 ggtgtacaaa ggtgacgtct ataacatgga ctaccgcccc tttggcgag gaagaccagg  
4021 acaatttggc gatatccaaa gtcgcacacc tgagagtaaa gacgtctatg ctaatacaca  
4081 actggtactg cagagaccgg ctgtgggtac ggtacacgtg ccatactctc aggcaccatc  
4141 tggctttaag tattggctaa aagaacgcgg ggcgtcgtg cagcacacag caccatttgg  
4201 ctgccaaata gcaacaaacc cggtaagagc ggtgaactgc gccgtaggga acatgccat  
4261 ctccatcgac ataccggaag cggcctcac tagggctcgtc gacgcgccct ctttaacgga  
4321 catgtcgtgc gaggtaccag cctgcaccca ttctcagac tttggggcg tcgccattat  
4381 taaatatgca gccagcaaga aaggcaagtg tgcggtgcat tcgatgacta acgcccgcac  
4441 tattcgggaa gctgagatag aagttgaagg gaattctcag ctgcaaatct ctttctcgac  
4501 ggccttagcc agcgcgcaat tccgcgtaca agtctgttct acacaagtac actgtgcagc  
4561 cgagtggccac cccccgaag accacatagt caactaccg gcgtcacata ccacctcgg  
4621 ggtcccaggac atctccgcta cggcgtgtc atgggtgcag aagatcacgg gagggtggg  
4681 actggttgtt gctgttggcg cactgattct aatcgtggtg ctatgcgtgt cgttcagcag  
4741 gcaactaatt ttatcctgca ggacttcgaa accgttattt atagcagata tagggatagg  
4801 agtaggaatg ccacaaatga aaaaaatct taaaatgtaa tcttaatcga gtacaccaca  
4861 cgacaatgaa caaacctaag acagattatg ctggttatgc ttgctgcgta atatgcggtc  
4921 taatttctcg aattattttt acagcgacac tattaaaagt tgtagaacgt aaattagttc  
4981 atacaccatc aatagataaa acgataaaa atgcatatat tagagaagat tctcctactg  
5041 actggataag ctataataat aaatgtatcc atttatctac tgatcgaaaa acctgggagg  
5101 aaggacgtaa tacatgcaaa gctctaaatc caaattcgga tctaattaag atagagactc  
5161 caaacgagtt aagtttttta agaagcctta gacgaggcta tgggtagga gaatccgaaa  
5221 tattaacca gacaacccca tataatttta tagctaaaaa tgccacgaag aatggaata

5281 tattttagtagc acaacgaata ctcccaact gcattcgtgt tacactatat aacaattaca  
 5341 ctacattttt atcataccac tacttcggtt agatgtttta g

//

### ZIKV-PrME immunogen genes located between B6R and B9R ORFs

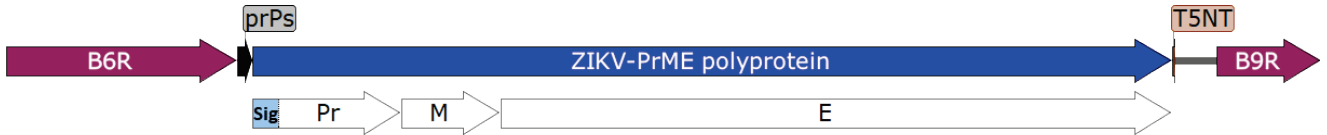

LOCUS Exported 2968 bp ds-DNA linear UNA 27-FEB-2018  
 DEFINITION ZIKV-PrME expression cassette within SCV1002.  
 ACCESSION .  
 VERSION .  
 KEYWORDS .  
 SOURCE SCV1002  
 ORGANISM SCV1002  
 REFERENCE 1 (bases 1 to 2968)  
 AUTHORS Paul Howley  
 TITLE Direct Submission  
 JOURNAL Exported Feb 27, 2018 from SnapGene 4.1.5  
<http://www.snapgene.com>  
 COMMENT ZIKV-PrME expression cassette was inserted by homologous recombination to replace both B7R and B8R ORFs

FEATURES Location/Qualifiers  
 source 1..2968  
 /organism="SCV1002"  
 /strain="Copenhagen"  
 /mol\_type="genomic DNA"  
 CDS 1..522  
 /codon\_start=1  
 /product="putative protein"  
 /label=B6R  
 /note="VACV-COP-B6R ORF"  
 /translation="MSSSDVDIYDAVRAFLLRHYYNKRIFVYGRSNAILHNIYRLFTR  
 CAVIPFDDIVRTMPNESRVKQWVMDTLNGIMMNERDVSVSVGTGILFMEMFFDYNKNSI  
 NNQLMYDIINSVSIILANERYRSAFNDDGIYIRRNMINKLYGYASLTTIGTIAAGVVCYY  
 LLMHLVSLYK"  
 promoter 523..557  
 /label=prPs  
 /note="Vaccinia virus early/late promoter"  
 CDS 558..2633  
 /codon\_start=1  
 /product="PrME polyprotein"  
 /label=ZIKV-PrME polyprotein  
 /note="ZIKV-PrME polyprotein coding sequence from the  
 Brazilian ZikaSPH2015 isolate (Genbank: KU321639)"  
 /translation="MGADTSVGIVGLLLTTAMAAEVTRRGSAYMYLDRNDAGEAISFP  
 TTLGMNKYIQIMDLGHMCDATMSYECPLDEGVEPDDVDCWCNTTSTWVVYGTCHHK  
 GEARRSRAVTLPSHSTRKLQTRSQTWLESREYTKHLIRVENWIFRNPGFALAAAIAW  
 LLGSSTSQKVIYLVMIILLIAPAYSIRCIGVSNRDFVEGMSGGTWVDIVLEHGGCVTVMA  
 QDKPTVDIELVTTTIVSNMAEVRSYCYEASISDMASDSRCPTQGEAYLDKQSDTQYVCKR  
 TLVDRGWGNGCGLFGKGSVTPCAKFAKSKMTGKSIQPENLEYRIMLSVHGSQHSGMIV  
 NDTGHETDENRAKVEITPNSPRAEATLGGFGLDCEPRTGLDFSDLYLTMNNKHWL  
 VHKEWFHDIPLPWHAGADTTPHWNNKEALVEFKDAHAKRQTVVVLGSEQEGAVHTALAG  
 ALEAEMDGAKGRLSSGHLKCRKMDKRLKGVSYSLCTAAFTFTKI PAETLHGTVTVEV  
 QYAGTDGPCKVPAQMAVDMQTLTPVGRLLITANPVITESTENSKMMLELDPFPGDSYIVI  
 VGGEKKITHHWHRSSTIGKAFEATVRGAKRMAVLGDTAWDFGSGVGGALNSLKGKIHQI

```

mat_peptide      FGAAFKSLFGGMSWFSQILIGTLLMWLGLNTKNGSISLMCLALGGVLIFLSTAVSA"
                  558..893
                  /product="propeptide with N-terminal signal sequence "
                  /label=Pr
                  /note="ZIKV propeptide with N-terminal signal sequence
                  coding sequence"
mat_peptide      894..1118
                  /product="membrane protein"
                  /label=M
                  /note="ZIKV mature Membrane protein coding sequence"
mat_peptide      1119..2633
                  /product="envelope glycoprotein"
                  /label=E
                  /note="ZIKV envelope protein coding sequence"
misc_feature     2634..2640
                  /label=T5NT
                  /note="Poxvirus early transcriptional stop sequence"
CDS              2735..2968
                  /codon_start=1
                  /product="6 kDa intracellular protein; non-essential for
                  virus replication and virulence"
                  /label=B9R
                  /note="VACV-COP-B9R ORF"
                  /translation="MRSLLIIVLLFPSIIYSMSIRRCEKTEEBETWGLKIGLCIIAKDFYP
                  ERTDCSVHLPTASEGLITEGNGFRDIRNTDKL"

```

ORIGIN

```

1 atgtcttctt cagtggatgt tgatatctac gatgccgta gagcattttt actcaggcac
61 tattataaca agagatttat tgtgtatgga agaagtaacg ccatattaca taatataata
121 aggctattta caagatgcmc cgttataaccg ttcgatgata tagtacgtac tatgccaaat
181 gaatcacgtg ttaaacaatg ggtgatggat acacttaatg gtataatgat gaatgaacgc
241 gatgtttctg taagcgttgg caccggaata ctattcatgg aaatgttttt cgattacaat
301 aaaaatagta tcaacaatca actaatgtat gatataatta atagcgtatc tataattcta
361 gctaatagaga gatatagaag cgcttttaac gacgatggta tatacatccg tagaaatatg
421 attaacaagt tgtacggata cgcactctca actactattg gcacgatcgc tggagggtgtt
481 tgttattatc tgttgatgca tctagttagt ttgtataaat aaattgaaat tttatttttt
541 ttttttggaa tataaatatg ggcgcagata ctagtgtcgg aattgttggc ctctgtctga
601 ccacagctat ggcagcggag gtcactagac gtgggagtcg atactatatg tacttgaca
661 gaaacgatgc tggggaggcc atatcttttc caaccacatt ggggatgaat aagtgttata
721 tacagatcat ggatcttggg cacatgtgtg atgccacat gagctatgaa tgcctatgc
781 tggatgaggg ggtggaacca gatgacgtcg attgttgggt caacacgacg tcaacttggg
841 ttgtgtacgg aacctgccat cacaaaaaag gtgaagcacg gagatctaga agagctgtga
901 cgctcccctc ccattccact aggaagctgc aaacgcggtc gcaaacctgg ttggaatcaa
961 gagaatacac aaagcacttg attagatgctg aaaattggat attcaggaac cctggcttcg
1021 cgttagcagc agctgcatc gcttggcttt tgggaagctc aacgagcaa aaagtcatat
1081 acttggctat gatactgctg attgcccgg catacagcat cagggtcata ggagtcagca
1141 atagggactt tgtggaaggt atgtcaggtg ggacttgggt tgatattgtc ttggaacatg
1201 gaggttgtgt caccgtaatg gcacaggaca aaccgactgt cgacatagag ctggttacaa
1261 caacagtcag caacatggcg gaggtaagat cctactgcta tgaggcatca atatcagaca
1321 tggcttcgga cagccgctgc ccaacacaag gtgaagccta ccttgacaag caatcagaca
1381 ctcaatatgt ctgcaaaaaga acgttagtgg acagaggctg gggaaatgga tgtggacttt
1441 ttggcaagg gagtctggtg acatgcgcta agtttgcatg ctccaagaaa atgaccggga
1501 agagcatcca gccagagaa ctggagtacc ggataatgct gtcagttcat ggctcccagc
1561 acagtgggat gatcgttaat gacacaggac atgaaactga tgagaataga gcgaaggttg
1621 agataacgcc caattacca agagccgaag ccaccctggg gggttttgga agcctaggac
1681 ttgatttga accgaggaca ggccttgact tttcagattt gtattacttg actatgaata
1741 acaagcactg gttggttcac aaggagtgtt tccacgacat tccattacct tggcagctg
1801 ggcagacac cggaaactca cactggaaca acaagaagc actggtagag ttcaaggacg
1861 cacatgcaaa aaggcaaaact gtcgtggttc tagggagtca agaaggagca gttcacacgg
1921 cccttgctgg agctctggag gctgagatgg atggtgcaaa ggggaaggctg tcctctggcc
1981 acttgaaatg tgcctgaaa atggataaac ttagattgaa gggcgtgtca tactccttgt
2041 gtaccgcagc gttcacattc accaagatcc cggctgaaac actgcacggg acagtcacag
2101 tggaggtaca gtacgcaggg acagatggac cttgcaaggt tccagctcag atggcggtgg
2161 acatgcaaac tctgaccca gttgggaggt tgataaccgc taaccccgta atcactgaaa
2221 gcaactgaaa ctctaagatg atgctggaac ttgatccacc atttggggac tcttaccattg
2281 tcataggagt cggggagaag aagatcacc accactggca caggagtggc agcaccattg
2341 gaaaagcatt tgaagccact gtgagaggtg ccaagagaat ggcagtcttg ggagacacag
2401 cctgggactt tggatcagtt ggaggcgtc tcaactcatt gggcaagggc atccatcaa
2461 tttttggagc agctttcaaa tcattgtttg gaggaatgct ctggttctca caaattctca

```

```

2521 ttggaacgtt gctgatgtgg ttgggtctga acacaaagaa tggatctatt tcccttatgt
2581 gcttggcctt agggggagtg ttgatcttct tatccacagc cgtctctgct taatttttat
2641 ttaattaact aattttttatt aatgatacaa aaacgaaata aaactgcata ttatacactg
2701 gttaacgccc ttataggctc taaccatttt caagatgagg tccctgatta tagtccttct
2761 gttcccctct atcatctact ccatgtctat tagacgatgt gagaagactg aagaggaaac
2821 atggggattg aaaatagggt tgtgtataat tgccaaagat ttctatcccg aaagaactga
2881 ttgcagtgtt catctcccaa ctgcaagtga aggattgata actgaaggca atggattcag
2941 ggatatacga aacaccgata aattataa

```

//

### D13L deletion site

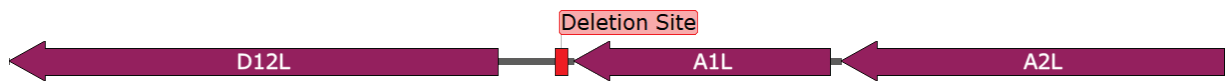

```

LOCUS       Exported                2146 bp ds-DNA     linear     UNA 27-FEB-2018
DEFINITION  D13L deletion site of SCV1002.
ACCESSION   .
VERSION     .
KEYWORDS    .
SOURCE      SCV1002
  ORGANISM  SCV1002
REFERENCE   1  (bases 1 to 2146)
  AUTHORS   Paul Howley
  TITLE     Direct Submission
  JOURNAL   Exported Feb 27, 2018 from SnapGene 4.1.5
            http://www.snapgene.com
COMMENT     The D13L ORF was deleted by homologous recombination and rescue in a
            cell line expressing in trans the D13 protein
FEATURES             Location/Qualifiers
     source           1..2146
                     /organism="SCV1002"
                     /strain="Copenhagen"
                     /mol_type="genomic DNA"
     CDS              complement(1..864)
                     /codon_start=1
                     /product="mRNA capping enzyme small subunit;
                     methyltransferase"
                     /label=D12L
                     /note="VACV-COP-D12L"
                     /translation="MDEIVKNIREGTHVLLPFYETLPELNLSLGKSPLPSLEYGANYFL
                     QISRVDLNRMPDMLKLFTHDIMLPESDLKVEYIILKINSVKYYGRSTKADAVVADLS
                     ARNKLFKRERDAIKSNHLTENNLYISDYKMLTFDVFRLPFDVNEKYCI IKLPTLFGR
                     GVIDTMRIYCSLFFKNVRLKCVSDSWLKDSAIMVASDVCKKNLDFMSHVKS SVTKSSSW
                     KDVNSVQFSILNDPVDTEFINKFLEFSNRVYEALYYVHSLLYSSMTSDSKSIENKHQRR
                     LVKLLL"
     misc_feature     965..988
                     /label=Deletion Site
                     /note="Remnants of the D13L deleted ORF"
     CDS              complement(999..1451)
                     /codon_start=1
                     /product=" late gene transcription factor VLTF-2"
                     /label=A1L
                     /note="VACV-COP-A1L"
                     /translation="MAKRVSLPDVVISAPKAVFKPAKEEALACILPKYYKSMADVSIKT
                     NSVIDKCWFCNQDLVFRPISIETYKGGVEGYFCSKICRDSLASMVKSHVALREEPKISL
                     LPLVIFYEDKEKVINTINLLRDKDGVYGSCYFKENSQIIDISLRSL"

```

```

CDS          complement(1472..2146)
             /codon_start=1
             /product="late gene transcription factor VLTF-3"
             /label=A2L
             /note="VACV-COP-A2L ORF"
             /translation="MNLRLCSGCRHNGIVSEQGYEYCFESVFKCTKVQKSNFHVS
NKLIHLRNVLRRLLSHQCSGEIISELLDIMEKNQISTDDVDANFVSSFLKANERINKKD
YKLVFEIINQVKDEKLNLSSTEKINEVVEIFKHLVFFCQENTPSKTIYNSFFLDKIFDIT
SVTKNLKPQTVKNYTKNNSNQLVWENFLAHMRSKRVTMVEDYGHEYVFDERFSTCSL
EV"

```

ORIGIN

```

1  tcacagcagt agtttaacta gtcttctctg atgtttgttt tcgatacttt tcgaatcaga
61 agtcatacta gaataaagca gcgagtgaac gtaatagaga gcttcgtata ctctattcga
121 aaactctaag aacttattaa tgaattccgt atccactgga tcgtttaaaa tactaaattg
181 aacactgttc acatccttcc aagaagaaga cttagtgcg gacttaacat gagacataaa
241 taaatccaaa ttttttttac aaacatcact agccaccata atggcgctat ctttcaacca
301 gctatcgctt acgcatttta gcagctaac atttttaaag agactacaat atatttctcat
361 agtatcgatt acacctctac cgaataaagt tgggaagtta ataatacaat atttttcggt
421 tacaaaatca aataatggtc gaaacacgtc gaaggttaac atcttataat cgctaagtga
481 tagattgttt tcagtgagat gattattaga tttaatagca tctcgttcac gtttgaacag
541 tttattgctg gcgctgaggt cggcaactac ggcgtccgct ttagtactcc tcccataata
601 ctttacgcta ttaatcttta aaatttcata gactttatct agatcgcttt ctggtaacat
661 gatatcatgt gtaaaaagtt ttaacatgct ggtcggcatt ctatttagat cattaactct
721 agaaaactga agaaaagtaa tagctccgta ttccagacta ggtaatgggc ttttacctag
781 agacagatta agttctggca atgtttcata aaatggaaga aggacatgcg ttcctcccg
841 gatatttttt acaatttcat ccatttacia ctctatagtt tgttttcatt attattagtt
901 attatctccc ataactcttg taatacttac cccttgatcg taagatacct tatacaggtc
961 attacctgca ggttaattaa atttaaattg gaaaaagctt acaataaact ccgtagagaa
1021 atatctataa tttgtgagtt ttccttaaag taacagcttc cgtaaacgcc gtctttatct
1081 cttagtaagt ttattgtatt tataaccttt tccttatctt catagaatac taaaggcaac
1141 aaagaaatth ttggttcttc tctaagagct acgtgagact taaccataga agccaacgaa
1201 tccctacata tttttagaaca gaaataccct acttcaccac ccttgatgt ctcaatacta
1261 ataggtctaa aaaccaaatac ttgattacia aaccaacact tatcaattac actatttgtc
1321 ttaatagaca catctgccat agatttataa tactttggta gtatacaagc gagtgcttct
1381 tcttttagcgg gcttaaagac tgcttttagt gctgaaataa ccacatctgg aaggcttact
1441 cgcttagcca ttttaattacg gaactattht tttatacttc taatgagcaa gtagaaaacc
1501 tctcatctac aaaaacgtac tcgtgtccat aatcctctac catagtaaca cgttttttag
1561 atctcatatg tgctaaaaag ttttccata ctaattgggt actattatth ttcgtataat
1621 ttttaacagt ttgaggtht agattthttag ttacagaagt gatatcgaat atthtatcca
1681 aaaagaatga gtaattaatt gtcttagaag gaggthttht ttggcaaaag aataccaagt
1741 gcttaaataat ttctactact tcattaactt tttctgtact cagattcagt ttctcatctt
1801 ttacttgatt gattatttca aagactaact tataatcctt tttatttatt ctctcgttag
1861 ccttaagaaa actagataca aaatttgcac ctacatcatc cgtggatatt tgattthttht
1921 catgatatc caagagthtcc gagataatth ctccagaaca ttgatgagac aataatctcc
1981 gcaatacatt tctcaaatga ataagthttag tagacacgtg gaagthtgac tttthtthtga
2041 cctthtgata tttthtgaat accgactcgc aaaaaataca atattcatat cctthtthtcag
2101 atactatacc gthtthtctca caaccgctac ataatcgtag atthcat

```



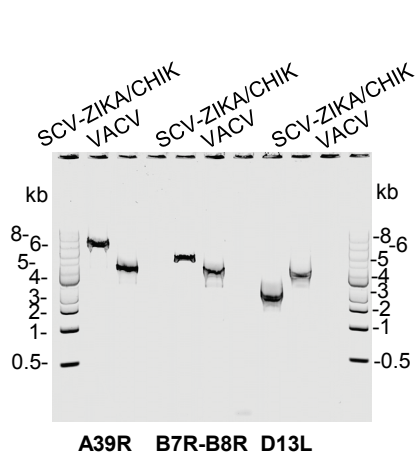

Corresponds to Figure 1c

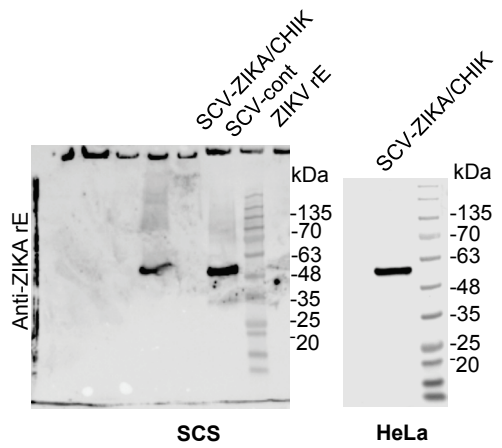

Corresponds to Figure 1d

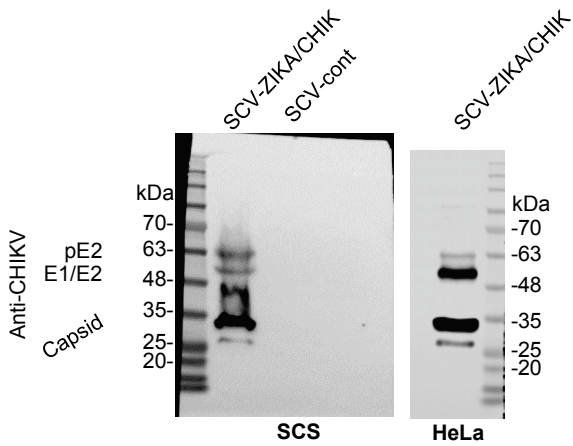

Corresponds to Figure 1e

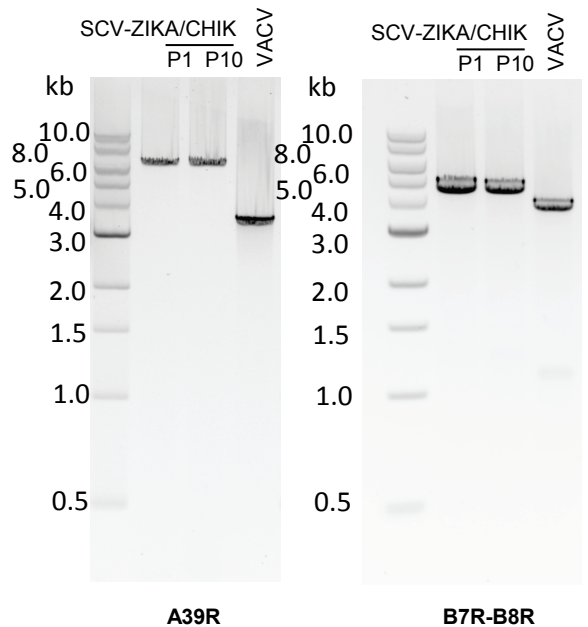

Corresponds to Figure 1f

**Supplementary Fig. 4.** Uncropped Western blots and PCR gel images for Fig. 1.
